# Supplementary material for: The Comparison of Endoscopic Biliary Drainage in Malignant Hilar Obstruction by Cholangiocarcinoma: Bilateral Metal Stents versus Multiple Plastic Stents
Source: PubMed Central journal article supplement — Gut Liver. 2021 Nov 15;15(6):922–9. doi: 10.5009/gnl20257 (PMC8593498; doi:10.5009/gnl20257), 2021-11-15
Supplement: gnl-15-6-922-supple.pdf [file gnl-15-6-922-supple.pdf]

**Supplementary Table 1.** Factors Associated with Successful Drainage

| Factor                  | Initial EBD       |                      |
|-------------------------|-------------------|----------------------|
|                         | Crude OR (95% CI) | Adjusted OR (95% CI) |
| Sex                     |                   |                      |
| Female                  | Reference         | Reference            |
| Male                    | 1.66 (0.71–3.89)  | 1.47 (0.56–3.91)     |
| Age at treatment        | 0.98 (0.94–1.02)  | 0.99 (0.94–1.04)     |
| BMI                     | 1.03 (0.92–1.17)  | 1.05 (0.92–1.21)     |
| Smoking                 | 1.06 (0.45–2.50)  | 1.23 (0.45–3.36)     |
| Underlying disease      |                   |                      |
| Hypertension            | 0.53 (0.23–1.24)  | 0.38 (0.13–1.08)     |
| Diabetes                | 0.68 (0.22–2.09)  | 0.66 (0.18–2.40)     |
| Bismuth type            |                   |                      |
| I/II                    | 2.11 (0.41–10.87) | 4.54 (0.76–26.94)    |
| IIIa/IIIb               | 1.10 (0.45–2.71)  | 1.11 (0.41–3.00)     |
| IV                      | Reference         | Reference            |
| Total bilirubin         | 1.07 (1.01–1.14)  | 1.09 (1.02–1.18)     |
| PT INR                  | 0.07 (0.01–0.81)  | 0.08 (0.00–1.63)     |
| Albumin                 | 1.83 (0.92–3.62)  | 1.62 (0.72–3.65)     |
| Emergent procedure      | 0.11 (0.01–0.99)  | 0.05 (0.00–0.87)     |
| Treatment               |                   |                      |
| No treatment            | Reference         | Reference            |
| Treatment               | 0.86 (0.58–1.27)  | 0.91 (0.61–1.37)     |
| Stent type and number   |                   |                      |
| Bilateral metal stents  | 1.31 (0.54–3.18)  | 1.17 (0.44–3.14)     |
| Multiple plastic stents | Reference         | Reference            |

Adjusted for BMI, bismuth type (I/II, IIIa/IIIb and IV), time varying total bilirubin, PT INR, and albumin.

EBD, endoscopic biliary drainage; OR, odds ratio; CI, confidence interval; BMI, body mass index; PT, prothrombin time; INR, international normalized ratio.

**Supplementary Table 2.** Factors Associated with Cholangitis

| Factor                  | Overall EBD       |                      |
|-------------------------|-------------------|----------------------|
|                         | Crude HR (95% CI) | Adjusted HR (95% CI) |
| Sex                     |                   |                      |
| Female                  | 1.64 (0.98–2.75)  | 1.42 (0.89–2.26)     |
| Male                    | Reference         | Reference            |
| Age                     | 1.00 (0.98–1.02)  | 0.99 (0.97–1.01)     |
| BMI                     | 1.02 (0.96–1.08)  | 1.05 (0.99–1.11)     |
| Smoking                 | 0.70 (0.42–1.16)  | 0.77 (0.48–1.24)     |
| Underlying disease      |                   |                      |
| Hypertension            | 1.21 (0.71–2.04)  | 1.05 (0.63–1.73)     |
| Diabetes                | 0.90 (0.28–2.86)  | 0.88 (0.32–2.44)     |
| Bismuth type            |                   |                      |
| I/II                    | Reference         | Reference            |
| IIIa/IIIb               | 1.37 (0.57–3.30)  | 1.19 (0.51–2.78)     |
| IV                      | 1.35 (0.61–2.99)  | 1.23 (0.56–2.71)     |
| Total bilirubin         | 1.02 (0.99–1.05)  | 1.02 (0.99–1.05)     |
| PT INR                  | 2.46 (0.91–6.66)  | 1.55 (0.56–4.28)     |
| Albumin                 | 0.61 (0.42–0.88)  | 0.67 (0.47–0.95)     |
| Emergent procedure      | 1.45 (0.75–2.81)  | 0.70 (0.22–2.21)     |
| Treatment               |                   |                      |
| No treatment            | Reference         | Reference            |
| Treatment               | 1.42 (0.80–2.53)  | 1.67 (0.97–2.86)     |
| Stent type and number   |                   |                      |
| Bilateral metal stents  | Reference         | Reference            |
| Multiple plastic stents | 1.93 (1.14–3.25)  | 2.08 (1.21–3.58)     |

Adjusted for BMI, bismuth type (I/II, IIIa/IIIb and IV), time varying total bilirubin, PT INR, and albumin.

EBD, endoscopic biliary drainage; HR, hazard ratio; CI, confidence interval; BMI, body mass index; PT, prothrombin time; INR, international normalized ratio.

**Supplementary Table 3 .** Factors Associated with Mortality within 6 Months

| Factor                  | Overall EBD        |                      |
|-------------------------|--------------------|----------------------|
|                         | Crude HR (95% CI)  | Adjusted HR (95% CI) |
| Sex                     |                    |                      |
| Female                  | 0.74 (0.37–1.47)   | 0.92 (0.40–2.13)     |
| Male                    | Reference          | Reference            |
| Age                     | 1.05 (1.01–1.08)   | 1.05 (1.01–1.09)     |
| BMI                     | 0.98 (0.89–1.07)   | 1.05 (0.94–1.18)     |
| Smoking                 | 0.92 (0.47–1.81)   | 0.84 (0.37–1.89)     |
| Underlying disease      |                    |                      |
| Hypertension            | 1.02 (0.54–1.95)   | 1.69 (0.73–3.91)     |
| Diabetes                | 1.45 (0.64–3.31)   | 0.98 (0.37–2.56)     |
| Clinical stage          |                    |                      |
| IIIc                    | Reference          | Reference            |
| IVa                     | 2.08 (0.56–7.70)   | 1.53 (0.39–5.91)     |
| IVb                     | 16.07 (4.80–53.81) | 12.31 (3.52–43.08)   |
| Bismuth type            |                    |                      |
| I/II                    | Reference          | Reference            |
| IIIa/IIIb               | 2.38 (0.54–10.46)  | 1.01 (0.21–4.78)     |
| IV                      | 2.1 (0.49–8.95)    | 1.19 (0.26–5.45)     |
| Total bilirubin         | 1.06 (1.02–1.10)   | 1.04 (0.99–1.10)     |
| PT INR                  | 2.17 (0.74–6.36)   | 0.71 (0.14–3.46)     |
| Albumin                 | 0.42 (0.29–0.61)   | 0.41 (0.26–0.66)     |
| Emergent procedure      | 1.02 (0.25–4.26)   | 1.78 (0.26–12.35)    |
| Treatment               |                    |                      |
| No treatment            | Reference          | Reference            |
| Treatment               | 0.47 (0.14–1.56)   | 0.43 (0.12–1.54)     |
| Stent type and number   |                    |                      |
| Bilateral metal stents  | Reference          | Reference            |
| Multiple plastic stents | 1.89 (0.93–3.82)   | 2.91 (1.26–6.71)     |

Adjusted for BMI, clinical stage, bismuth type (I/II, IIIa/IIIb and IV), time varying total bilirubin, PT INR, albumin and stent type.

EBD, endoscopic biliary drainage; HR, hazard ratio; CI, confidence interval; BMI, body mass index; PT, prothrombin time; INR, international normalized ratio.
